# Supplementary material for: A register-based approach to identifying treatment-resistant depression—Comparison with clinical definitions
Source: PubMed Central journal article supplement (PMC7392234; doi:10.1371/journal.pone.0236434), 2020-07-30
Supplement: pone.0236434.s003.pdf [file pone.0236434.s003.pdf]

| ATC     | Name            | DDD (mg) | Lowest Dose (mg) | Adequate Dose (mg) |
|---------|-----------------|----------|------------------|--------------------|
| N06AA02 | imipramine      | 100      | 50               | 100                |
| N06AA04 | clomipramine    | 100      | 50               | 75                 |
| N06AA06 | trimipramine    | 150      | 50               | 75                 |
| N06AA09 | amitriptyline   | 75       | 75               | 75                 |
| N06AA10 | nortriptyline   | 75       | 75               | 75                 |
| N06AA21 | maprotiline     | 100      | 75               | 75                 |
| N06AB03 | fluoxetine      | 20       | 20               | 20                 |
| N06AB04 | citalopram      | 20       | 20               | 20                 |
| N06AB05 | paroxetine      | 20       | 20               | 20                 |
| N06AB06 | sertraline      | 50       | 50               | 50                 |
| N06AB08 | fluvoxamine     | 100      | 100              | 100                |
| N06AB10 | escitalopram    | 10       | 10               | 10                 |
| N06AF03 | phenelzine      | 60       | 60               | 90                 |
| N06AF04 | tranylcypromine | 10       | 30               | 30                 |
| N06AG02 | moclobemide     | 300      | 300              | 300                |
| N06AX03 | mianserin       | 60       | 30               | 30                 |
| N06AX05 | trazodone       | 300      | 150              | 150                |
| N06AX06 | nefazodone      | 400      | 300              | 400                |
| N06AX11 | mirtazapine     | 30       | 30               | 30                 |
| N06AX12 | bupropion       | 300      | 150              | 150                |
| N06AX14 | tianeptine      | 37.5     | 25               | 25                 |
| N06AX16 | venlafaxine     | 100      | 75               | 75                 |
| N06AX17 | milnacipran     | 100      | 100              | 100                |
| N06AX18 | reboxetine      | 8        | 8                | 8                  |
| N06AX21 | duloxetine      | 60       | 60               | 60                 |
| N06AX22 | agomelatine     | 25       | 25               | 25                 |
| N06AX26 | vortioxetine    | 10       | 10               | 10                 |
